# Supplementary material for: Production of formate by CO2 electrochemical reduction and its application in energy storage
Source: Royal Society of Chemistry journal article supplement (doi:10.1039/c9se00625g), 2019-12-09
Supplement: c9se00625g1.pdf [file c9se00625g1.pdf]

## Supplementary Information

# Production of formate from CO<sub>2</sub> reduction and its application in energy storage

Hang Xiang<sup>a</sup>, Hamish Andrew Miller<sup>b</sup>, Marco Bellini<sup>b</sup>, Henriette Christensen<sup>a</sup>, Keith Scott<sup>a</sup>,  
Shahid Rasul<sup>a,c</sup>, Eileen H. Yu<sup>a</sup>\*

<sup>a</sup> School of Engineering, Newcastle University, Newcastle Upon Tyne, UK

<sup>b</sup> Istituto di Chimica dei Composti Organometallici (CNR-ICCOM), Via Madonna del Piano 10,  
50019 Sesto Fiorentino, Firenze, Italy

<sup>c</sup> Faculty of Engineering and Environment, Northumbria University, Newcastle Upon Tyne, UK

\*Corresponding author: ([eileen.yu@ncl.ac.uk](mailto:eileen.yu@ncl.ac.uk))

**Table S1** Summary of eCO<sub>2</sub>R studies in terms of formate production

| Paper             | Reactor, Membrane, Catholyte, CO <sub>2</sub> flow.                                             | Catalyst/cathode                                                                       | Potential |                      | Current density $j$ (mA cm <sup>-2</sup> ) | Formate FE | Formate production    |                       |
|-------------------|-------------------------------------------------------------------------------------------------|----------------------------------------------------------------------------------------|-----------|----------------------|--------------------------------------------|------------|-----------------------|-----------------------|
|                   |                                                                                                 |                                                                                        | Cell (V)  | Cathodic (V vs. RHE) |                                            |            | Yield per hour (mg/h) | Conc. Per hour (mM/h) |
| Ref. <sup>1</sup> | H-cell +GDE holder, 0.5M KHCO <sub>3</sub> , CO <sub>2</sub> flow 30ml/min.                     | GDL and Sn-loading copper mesh (rolling press)<br>S <sub>geo</sub> : 7 cm <sup>2</sup> | ---       | -0.67                | Ap. -3.49                                  | Ap. 43%    | Cal. 9.01             | Catholyte vol. N.G.   |
|                   |                                                                                                 |                                                                                        | ---       | -0.87                | Ap. -13.48                                 | Ap. 46%    | Cal. 37.26            | Catholyte vol. N.G.   |
|                   |                                                                                                 |                                                                                        | ---       | -1.07                | Ap. -22.44                                 | Ap. 78%    | Cal. 105.17           | Catholyte vol. N.G.   |
|                   |                                                                                                 |                                                                                        | ---       | -1.27                | Ap. -23.85                                 | Ap. 65%    | Cal. 93.15            | Catholyte vol. N.G.   |
|                   |                                                                                                 |                                                                                        | ---       | -1.47                | Ap. -36.05                                 | Ap. 43%    | Cal. 93.15            | Catholyte vol. N.G.   |
| Ref. <sup>2</sup> | GDE flow cell 7ml/min 0.1M KHCO <sub>3</sub> , CO <sub>2</sub> flow 45ml/min                    | Sn-GDE with thin SnOx nanolayer<br>S <sub>geo</sub> : 4 cm <sup>2</sup>                | -0.8      | Ap. -0.05            | Ap. -1                                     | Ap. 55%    | Cal. 1.89             | Cal. 0.10             |
|                   |                                                                                                 |                                                                                        | -1.2      | Ap. -0.45            | Ap. -3                                     | Ap. 64%    | Cal. 6.60             | Cal. 0.34             |
|                   |                                                                                                 |                                                                                        | -1.6      | Ap. -0.85            | Ap. -7                                     | Ap. 73%    | Cal. 17.55            | Cal. 0.91             |
|                   |                                                                                                 |                                                                                        | -2.0      | Ap. -1.25            | Ap. -15                                    | Ap. 80%    | Cal. 41.21            | Cal. 2.13             |
| Ref. <sup>3</sup> | Microfluid GDE flow cell 0.5 ml/min Catholyte(pH = 2) CO <sub>2</sub> flow 50 mL/min            | Pb/PtRu-GDL<br>S <sub>geo</sub> : 0.1 cm <sup>2</sup>                                  | 2.5       | Ap. -1.1             | Ap. -20                                    | Ap. 60%    | Cal. 1.03             | Cal. 0.75             |
|                   |                                                                                                 |                                                                                        | 3         | Ap. -1.35            | Ap. -55                                    | Ap. 93%    | Cal. 4.39             | Cal. 3.18             |
|                   |                                                                                                 |                                                                                        | 3.5       | Ap. -1.6             | Ap. -150                                   | Ap. 90%    | Cal. 11.59            | Cal. 8.40             |
|                   |                                                                                                 |                                                                                        | 4         | Ap. -1.9             | Ap. -350                                   | Ap. 92%    | Cal. 27.64            | Cal. 20.03            |
| Ref. <sup>4</sup> | GDE flow cell 10ml/min 0.5M NaHCO <sub>3</sub> , CO <sub>2</sub> flow 10ml/min.                 | Sn-GDE<br>S <sub>geo</sub> : 10.2 cm <sup>2</sup>                                      | ---       | -0.6                 | Ap. -3                                     | Ap. 20%    | Cal. 5.25             | Cal. 0.19             |
|                   |                                                                                                 |                                                                                        | ---       | -0.8                 | Ap. -5                                     | Ap. 55%    | Cal. 24.08            | Cal. 0.87             |
|                   |                                                                                                 |                                                                                        | ---       | -1.0                 | Ap. -10                                    | Ap. 65%    | Cal. 56.92            | Cal. 2.06             |
|                   |                                                                                                 |                                                                                        | ---       | -1.2                 | Ap. -18                                    | Ap. 60%    | Cal. 94.57            | Cal. 3.43             |
| Ref. <sup>5</sup> | H-cell +GDE holder, 130 ml 0.1M Na <sub>2</sub> SO <sub>4</sub> , CO <sub>2</sub> flow 10ml/min | In/C-GDL<br>S <sub>geo</sub> : 0.95 cm <sup>2</sup>                                    | ---       | Ap. -1.2             | -7.5                                       | 38%        | Cal. 2.32             | Cal. 0.38             |

|                    |                                                                                                                                   |                                                                                                             |          |           |           |          |            |             |
|--------------------|-----------------------------------------------------------------------------------------------------------------------------------|-------------------------------------------------------------------------------------------------------------|----------|-----------|-----------|----------|------------|-------------|
| Ref. <sup>6</sup>  | 2C cell,<br>10ml CO <sub>2</sub> -bubbled 0.1 M KHCO <sub>3</sub> ,<br>CO <sub>2</sub> flow 6 ml/min.                             | Hierarchical Cu pillar electrode<br>S <sub>geo</sub> : 1 cm <sup>2</sup>                                    | ---      | -0.2      | Ap. -0.4  | Ap. 9.5% | Cal. 0.03  | Cal. 0.07   |
|                    |                                                                                                                                   |                                                                                                             | ---      | -0.4      | Ap. -0.9  | Ap. 24%  | Cal. 0.19  | Cal. 0.40   |
|                    |                                                                                                                                   |                                                                                                             | ---      | -0.6      | Ap. -1.9  | Ap. 26%  | Cal. 0.42  | Cal. 0.92   |
|                    |                                                                                                                                   |                                                                                                             | ---      | -0.8      | Ap. -3.4  | Ap. 22%  | Cal. 0.64  | Cal. 1.40   |
|                    |                                                                                                                                   |                                                                                                             | ---      | -1.0      | Ap. -4.6  | Ap. 18%  | Cal. 0.71  | Cal. 1.55   |
| Ref. <sup>7</sup>  | H-type cell,<br>75ml CO <sub>2</sub> -bubbled 0.5 M KHCO <sub>3</sub> ,<br>CO <sub>2</sub> flow not given                         | SnOx(100-8)/GDL<br>S <sub>geo</sub> : 4 cm <sup>2</sup>                                                     | ---      | Ap. -1    | -14       | 83.4%    | Cal. 40.09 | Cal. 11.62  |
| Ref. <sup>8</sup>  | GDE cell,<br>50ml 0.5M KHCO <sub>3</sub> circulate<br>CO <sub>2</sub> flow 30 ml/min.                                             | Sn-NPs/GDL<br>S <sub>geo</sub> : 4 cm <sup>2</sup>                                                          | Ap. -3.1 | ---       | -10       | Ap. 90%  | Cal. 33.12 | Cal. 14.4   |
| Ref. <sup>9</sup>  | H-type cell,<br>75ml CO <sub>2</sub> -bubbled 0.5 M KHCO <sub>3</sub> , (PH=7.4)<br>CO <sub>2</sub> flow not given                | SnOx@MWCNT-COOH on GDL<br>S <sub>geo</sub> : 4 cm <sup>2</sup>                                              | ---      | -0.95     | Ap. -1.3  | Ap. 50%  | Cal. 2.23  | Cal. 0.647  |
|                    |                                                                                                                                   |                                                                                                             | ---      | -1.05     | Ap. -3.0  | Ap. 55%  | Cal. 5.66  | Cal. 1.642  |
|                    |                                                                                                                                   |                                                                                                             | ---      | -1.15     | Ap. -6.0  | Ap. 70%  | Cal. 14.42 | Cal. 4.180  |
|                    |                                                                                                                                   |                                                                                                             | ---      | -1.25     | Ap. -9.3  | Ap. 77%  | Cal. 24.59 | Cal. 7.128  |
|                    |                                                                                                                                   |                                                                                                             | ---      | -1.35     | Ap. -13.0 | Ap. 60%  | Cal. 26.78 | Cal. 7.764  |
| Ref. <sup>10</sup> | H-cell,<br>10ml CO <sub>2</sub> -saturated 0.5M NaHCO <sub>3</sub> (pH 7.2),<br>No CO <sub>2</sub> flow during eCO <sub>2</sub> R | Hierarchical Mesoporous SnO <sub>2</sub> Nanosheets on Carbon Cloth<br>S <sub>geo</sub> : 2 cm <sup>2</sup> | ---      | Ap. -0.38 | Ap. -2    | Ap. 28%  | Cal.       | Cal. 2.09   |
|                    |                                                                                                                                   |                                                                                                             | ---      | Ap. -0.58 | Ap. -7    | Ap. 35%  | Cal. 4.21  | Cal. 9.14   |
|                    |                                                                                                                                   |                                                                                                             | ---      | Ap. -0.78 | Ap. -24   | Ap. 46%  | Cal. 18.96 | Cal. 41.21  |
|                    |                                                                                                                                   |                                                                                                             | ---      | Ap. -0.98 | Ap. -50   | Ap. 90%  | Cal. 77.27 | Cal. 80     |
|                    |                                                                                                                                   |                                                                                                             | ---      | Ap. -1.18 | Ap. -70   | Ap. 50%  | Cal. 60.10 | Cal. 130.64 |
| Ref. <sup>11</sup> | H-cell,<br>30ml 1.0 M KHCO <sub>3</sub> ,<br>CO <sub>2</sub> flow 20 ml/min.                                                      | SnO <sub>2</sub> /carbon Aerogels "SnO <sub>2</sub> /CA-80"<br>S <sub>geo</sub> : 2 cm <sup>2</sup>         | ---      | -0.55     | Ap. -5    | Ap. 37%  | Ap. 12.14  | Ap. 8.80    |
|                    |                                                                                                                                   |                                                                                                             | ---      | -0.65     | Ap. -10   | Ap. 72%  | Ap. 25.39  | Ap. 18.40   |
|                    |                                                                                                                                   |                                                                                                             | ---      | -0.75     | Ap. -15   | Ap. 71%  | Ap. 25.39  | Ap. 18.40   |
|                    |                                                                                                                                   |                                                                                                             | ---      | -0.85     | Ap. -25   | Ap. 73%  | Ap. 26.50  | Ap. 19.20   |
|                    |                                                                                                                                   |                                                                                                             | ---      | -0.95     | Ap. -34   | Ap. 75%  | Ap. 27.05  | Ap. 19.60   |
|                    |                                                                                                                                   |                                                                                                             | ---      | -1.05     | Ap. -44   | Ap. 60%  | Ap. 20.42  | Ap. 14.80   |
|                    |                                                                                                                                   |                                                                                                             | ---      | -1.15     | Ap. -53   | Ap. 44%  | Ap. 15.46  | Ap. 11.20   |

|                    |                                                                                                                                                                                       |                                                                                         |     |           |          |         |            |            |
|--------------------|---------------------------------------------------------------------------------------------------------------------------------------------------------------------------------------|-----------------------------------------------------------------------------------------|-----|-----------|----------|---------|------------|------------|
| Ref. <sup>12</sup> | H-cell,<br>65 ml 0.5 M KHCO <sub>3</sub><br>CO <sub>2</sub> flow 30 ml/min                                                                                                            | SnPb alloy on carbon<br>cloth<br>S <sub>geo</sub> : 1 cm <sup>2</sup>                   | --- | Ap. -1.38 | -57.3    | 79.8%   | Cal. 39.26 | Ap. 13     |
| Ref. <sup>13</sup> | H-cell,<br>75 ml CO <sub>2</sub> -saturated<br>0.5 M KHCO <sub>3</sub> ,<br>No CO <sub>2</sub> flow during<br>eCO <sub>2</sub> R.                                                     | Cu-CDots nanocorals<br>S <sub>geo</sub> : 0.49 cm <sup>2</sup>                          | --- | -0.5      | Ap. -1   | Ap. 25% | Cal. 0.11  | Cal. 0.03  |
|                    |                                                                                                                                                                                       |                                                                                         | --- | -0.6      | Ap. -3.4 | Ap. 50% | Cal. 0.72  | Cal. 0.21  |
|                    |                                                                                                                                                                                       |                                                                                         | --- | -0.7      | Ap. -6   | Ap. 68% | Cal. 1.72  | Cal. 0.50  |
|                    |                                                                                                                                                                                       |                                                                                         | --- | -0.8      | Ap. -9.5 | Ap. 58% | Cal. 2.32  | Cal. 0.67  |
| Ref. <sup>14</sup> | H-cell,<br>Ap. 30 ml 0.1 M K <sub>2</sub> HPO <sub>4</sub><br>/ 0.1 KH <sub>2</sub> PO <sub>4</sub><br>electrolyte (pH 6.7),<br>No CO <sub>2</sub> flow during<br>eCO <sub>2</sub> R. | Pt <sub>x</sub> Pd <sub>(100-x)</sub> /C NPs<br>S <sub>geo</sub> : 0.49 cm <sup>2</sup> | --- | -0.1      | Ap. -1.4 | Ap. 20% | Cal. 0.19  | Cal. 0.14  |
|                    |                                                                                                                                                                                       |                                                                                         | --- | -0.2      | Ap. -1.6 | Ap. 20% | Cal. 0.22  | Cal. 0.16  |
|                    |                                                                                                                                                                                       |                                                                                         | --- | -0.3      | Ap. -1.8 | Ap. 70% | Cal. 0.85  | Cal. 0.62  |
|                    |                                                                                                                                                                                       |                                                                                         | --- | -0.4      | Ap. -2   | Ap. 84% | Cal. 1.13  | Cal. 0.82  |
|                    |                                                                                                                                                                                       |                                                                                         | --- | -0.5      | Ap. -4   | Ap. 60% | Cal. 1.62  | Cal. 1.17  |
| Ref. <sup>15</sup> | 2C cell, AEM<br>8 ml 0.1 M KHCO <sub>3</sub> ,<br>CO <sub>2</sub> flow 20 ml/min.                                                                                                     | Sn foil<br>S <sub>geo</sub> : 4.5 cm <sup>2</sup>                                       | --- | -0.4      | Ap. -    | Ap. 13% | Cal. 0.01  | Cal. 0.03  |
|                    |                                                                                                                                                                                       |                                                                                         | --- | -0.6      | Ap. -    | Ap. 10% | Cal. 0.05  | Cal. 0.14  |
|                    |                                                                                                                                                                                       |                                                                                         | --- | -0.87     | Ap. -3   | Ap. 67% | Cal. 7.77  | Cal. 21.10 |
|                    |                                                                                                                                                                                       |                                                                                         | --- | -1.0      | Ap. -7.3 | Ap. 70% | Cal. 19.74 | Cal. 53.64 |
|                    |                                                                                                                                                                                       |                                                                                         | --- | -1.27     | Ap. 14.3 | Ap. 54% | Cal. 29.83 | Cal. 81.07 |

**S<sub>geo</sub>**: electrode geometric surface area,

**Ap.**: Approximate value as seen directly from the given diagrams in literature,

**Cal.**: Calculated value based on the given and approximate values.

For the calculation method:

Hypothesis the current density  $j$  and formate production rate held constant within 1 hour,

$$\text{formate yield per hour (mg/h)} = \frac{FE_{\text{formate}} \times Q \times M_{r(\text{formate})}}{F \times 2} = \frac{FE_{\text{formate}} \times j \times S_{\text{geo}} \times 3600 \times 46}{96500 \times 2}$$

$$\text{formate conc. per hour (mM/h)} = \frac{\text{formate yield per hour}}{M_{r(\text{formate})} \times \text{Vol. catholyte}}$$



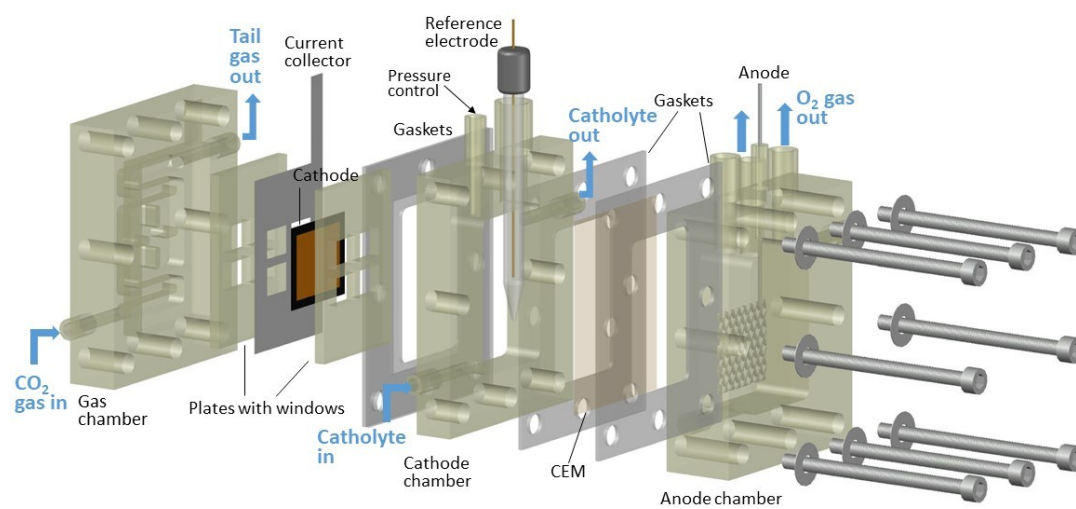

**Figure S1** 3D drawing of the GDE reactor set-up used in this study.

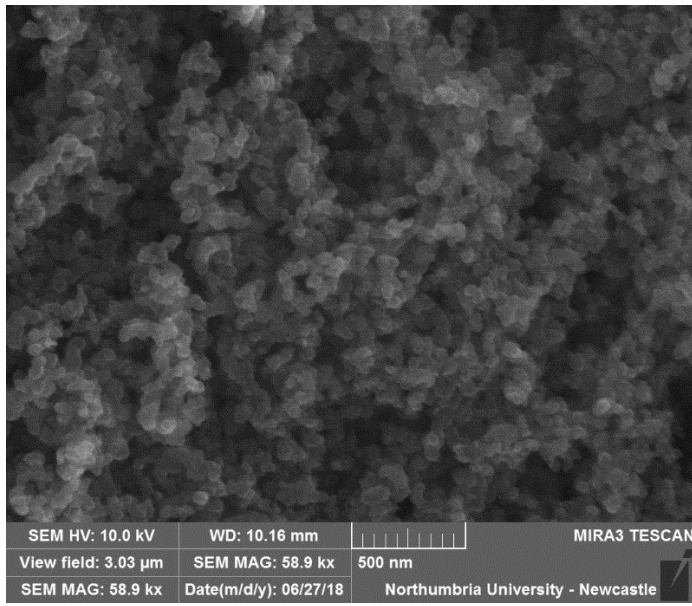

**Figure S2** SEM images of Vulcan XC-72 carbon black.

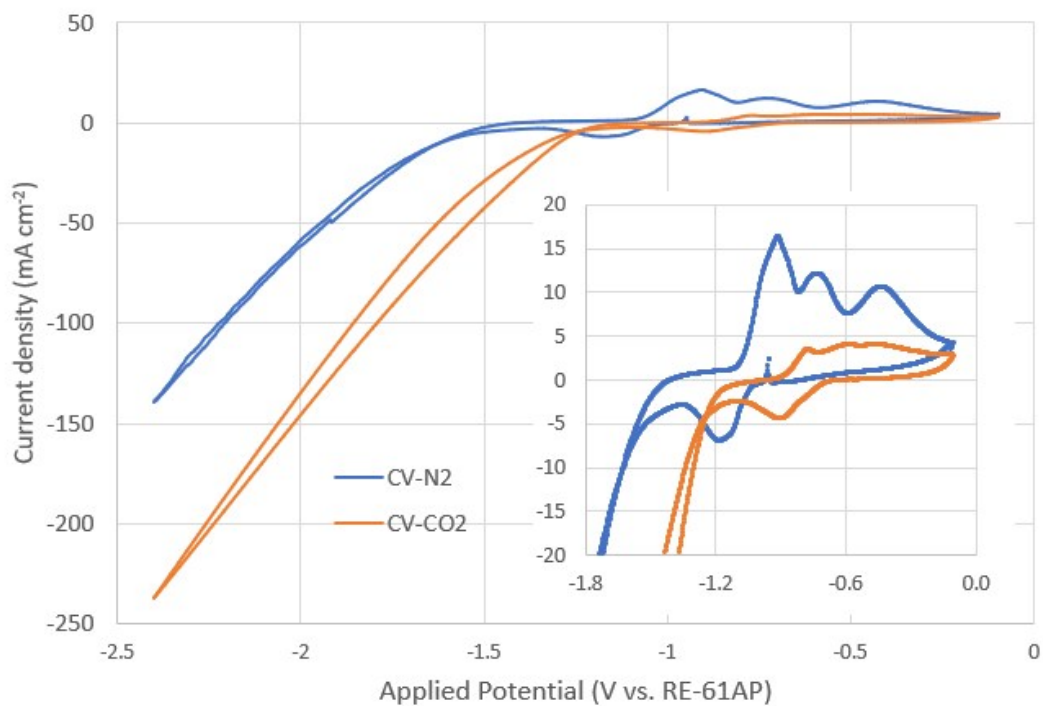

**Figure S3** Cyclic voltammetry (CV) measurements under N<sub>2</sub> (blue) and CO<sub>2</sub> (orange) atmosphere using SnO<sub>2</sub>/C(3.5) catalyst. Scan rate: 10 mV s<sup>-1</sup>, scan circles: 3, both diagrams were taken from the 3<sup>rd</sup> cycle of scan.



**Table S2** Normalized Faradaic efficiencies (FEs) of all the products and current density ( $j$ ) of eCO<sub>2</sub>Rs using different catalysts in gas diffusion electrode (GDE) cell with 1 M KOH catholyte, at wide range of cathodic potentials (V vs. RHE). Random error is shown in brackets.

| Cathodic potential | Catalyst                 | FE<br>(random error) |                    |                    | $j$ (mA cm <sup>-2</sup> )<br>(random error) |
|--------------------|--------------------------|----------------------|--------------------|--------------------|----------------------------------------------|
|                    |                          | H <sub>2</sub>       | CO                 | HCOO <sup>-</sup>  |                                              |
| -0.63 V            | C                        | 46.77%<br>(3.95%)    | 12.39%<br>(6.24%)  | 40.84%<br>(10.19%) | -7.36<br>(1.97)                              |
|                    | SnO <sub>2</sub> /C(0.5) | 4.96%<br>(0.97%)     | 33.77%<br>(6.57%)  | 61.27%<br>(7.54%)  | -13.84<br>(6.23)                             |
|                    | SnO <sub>2</sub> /C(1.0) | 3.44%<br>(1.27%)     | 31.38%<br>(2.71%)  | 65.18%<br>(1.44%)  | -22.30<br>(3.68)                             |
|                    | SnO <sub>2</sub> /C(3.5) | 4.47%<br>(2.24%)     | 17.11%<br>(7.93%)  | 78.42%<br>(5.69%)  | -31.72<br>(2.10)                             |
|                    | SnO <sub>2</sub>         | 17.09%<br>(6.35%)    | 12.08%<br>(10.05%) | 70.83%<br>(16.40%) | -28.20<br>(1.94)                             |
| -0.83 V            | C                        | 50.29%<br>(3.62%)    | 15.82%<br>(2.49%)  | 33.89%<br>(1.13%)  | -25.93<br>(2.16)                             |
|                    | SnO <sub>2</sub> /C(0.5) | 5.28%<br>(1.09%)     | 34.03%<br>(3.04%)  | 60.69%<br>(4.13%)  | -36.58<br>(0.30)                             |
|                    | SnO <sub>2</sub> /C(1.0) | 1.76%<br>(4.08%)     | 27.42%<br>(7.22%)  | 70.82%<br>(3.14%)  | -40.80<br>(10.08)                            |
|                    | SnO <sub>2</sub> /C(3.5) | 4.26%<br>(0.87%)     | 18.35%<br>(8.10%)  | 77.39%<br>(7.23%)  | -68.12<br>(0.28)                             |
|                    | SnO <sub>2</sub>         | 15.54%<br>(2.10%)    | 14.29%<br>(10.32%) | 70.17%<br>(12.42%) | -44.56<br>(8.18)                             |
| -1.03 V            | C                        | 48.58%<br>(1.13%)    | 18.99%<br>(3.00%)  | 32.43%<br>(4.13%)  | -59.83<br>(9.20)                             |
|                    | SnO <sub>2</sub> /C(0.5) | 3.83%<br>(1.06%)     | 20.28%<br>(3.99%)  | 75.89%<br>(2.93%)  | -72.35<br>(2.62)                             |
|                    | SnO <sub>2</sub> /C(1.0) | 1.72%<br>(2.67%)     | 22.25%<br>(4.52%)  | 76.03%<br>(1.85%)  | -126.95<br>(6.64)                            |
|                    | SnO <sub>2</sub> /C(3.5) | 3.83%<br>(1.17%)     | 18.44%<br>(1.92%)  | 77.72%<br>(0.74%)  | -123.74<br>(4.08)                            |
|                    | SnO <sub>2</sub>         | 21.40%<br>(2.91%)    | 10.34%<br>(5.59%)  | 68.26%<br>(2.68%)  | -106.63<br>(15.76)                           |
| -1.23 V            | C                        | 48.56%<br>(6.71%)    | 25.19%<br>(6.24%)  | 26.25%<br>(0.47%)  | -85.60<br>(3.11)                             |
|                    | SnO <sub>2</sub> /C(0.5) | 1.00%<br>(1.29%)     | 25.18%<br>(2.72%)  | 73.82%<br>(1.43%)  | -125.48<br>(24.15)                           |
|                    | SnO <sub>2</sub> /C(1.0) | 1.60%<br>(2.44%)     | 17.51%<br>(2.11%)  | 80.89%<br>(4.55%)  | -195.00<br>(5.73)                            |
|                    | SnO <sub>2</sub> /C(3.5) | 2.95%<br>(1.02%)     | 16.71%<br>(1.13%)  | 80.34%<br>(2.15%)  | -209.05<br>(13.11)                           |
|                    | SnO <sub>2</sub>         | 23.81%<br>(0.82%)    | 13.42%<br>(1.13%)  | 62.77%<br>(1.95%)  | -174.05<br>(18.41)                           |
| -1.43 V            | C                        | 57.66%<br>(1.51%)    | 19.87%<br>(0.55%)  | 22.47%<br>(2.06%)  | -119.04<br>(6.85)                            |

|  |                          |                   |                   |                   |                    |
|--|--------------------------|-------------------|-------------------|-------------------|--------------------|
|  | SnO <sub>2</sub> /C(0.5) | 2.44%<br>(0.59%)  | 14.29%<br>(6.29%) | 83.27%<br>(6.88%) | -156.78<br>(23.64) |
|  | SnO <sub>2</sub> /C(1.0) | 2.47%<br>(1.41%)  | 16.18%<br>(2.68%) | 81.35%<br>(4.09%) | -247.00<br>(8.94)  |
|  | SnO <sub>2</sub> /C(3.5) | 4.16%<br>(0.04%)  | 11.51%<br>(4.22%) | 84.33%<br>(4.18%) | -251.00<br>(8.43)  |
|  | SnO <sub>2</sub>         | 37.55%<br>(0.78%) | 7.21%<br>(1.18%)  | 55.24%<br>(1.96%) | -235.11<br>(5.62)  |

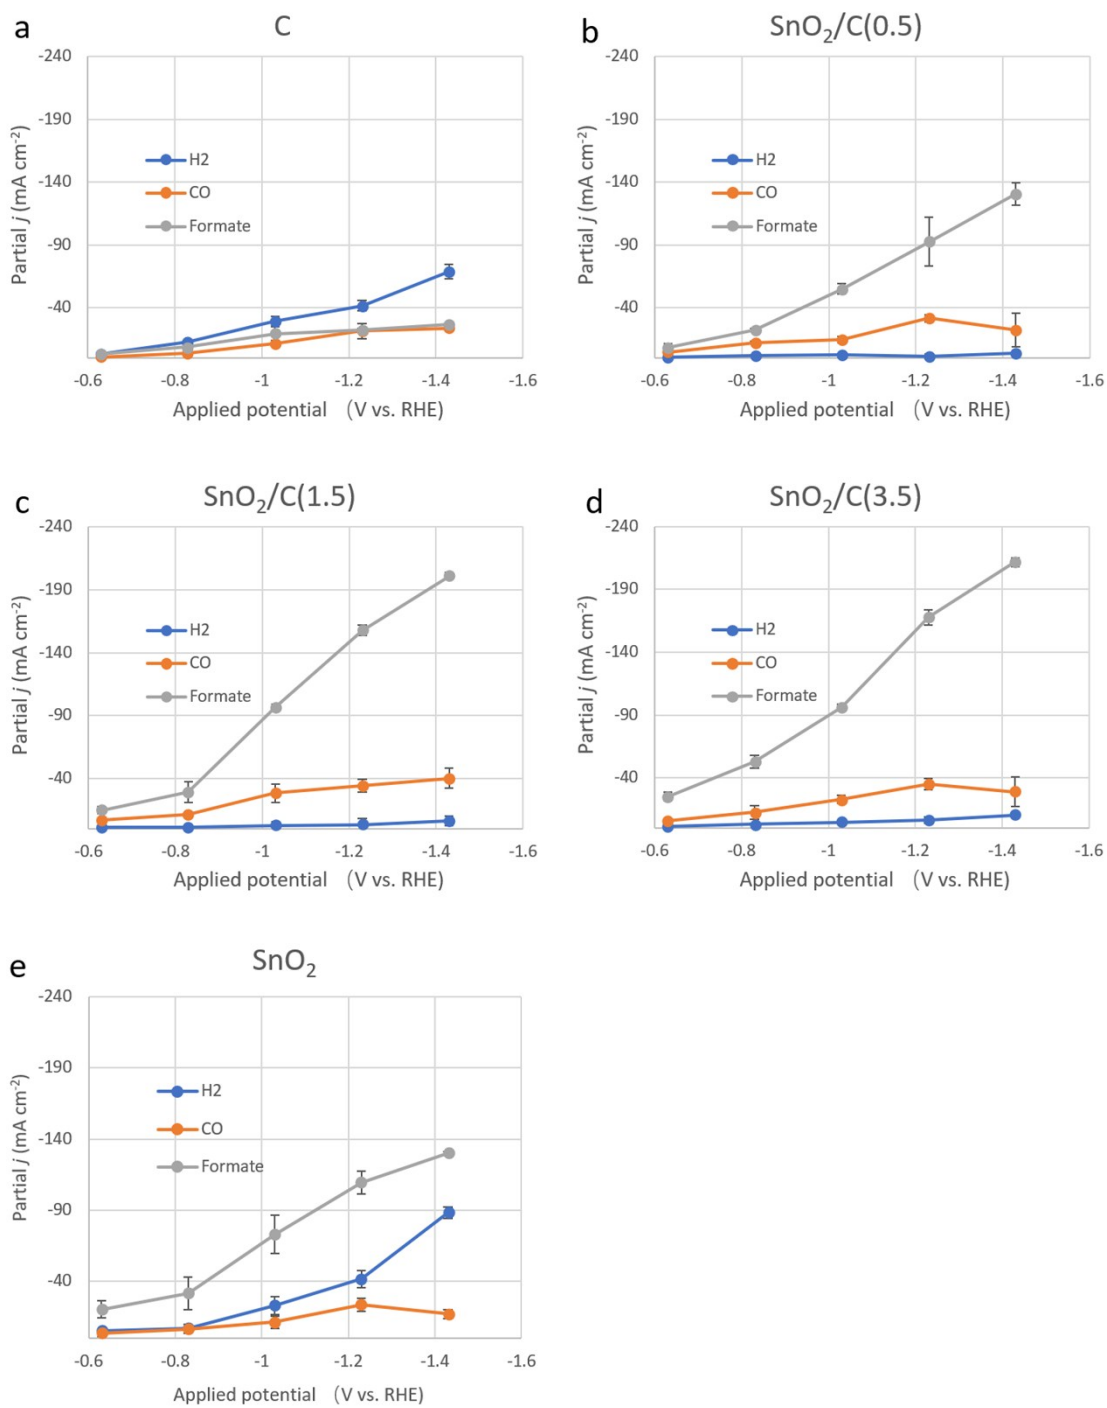

**Figure S4** Partial current densities to produce H<sub>2</sub>, CO, and format from eCO<sub>2</sub>R as a function of the applied potential for different catalysts: a) C, b) SnO<sub>2</sub>/C(0.5), c) SnO<sub>2</sub>/C(1.5), d) SnO<sub>2</sub>/C(3.5), e) SnO<sub>2</sub>.

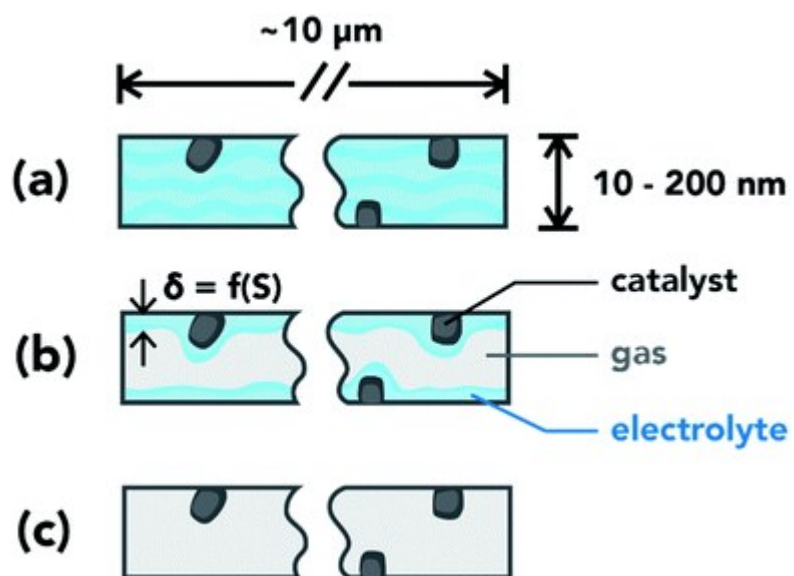

**Figure S5** Schematic of pore conditions in the catalyst layer. (a) Flooded pore: pore volume filled with electrolyte. (b) Wetted pore: a thin layer of electrolyte covers the pore walls. (c) Dry pore: catalyst inactive due to lack of an ionic pathway. Reproduced from Ref. <sup>16</sup> with permission from the PCCP Owner Societies.

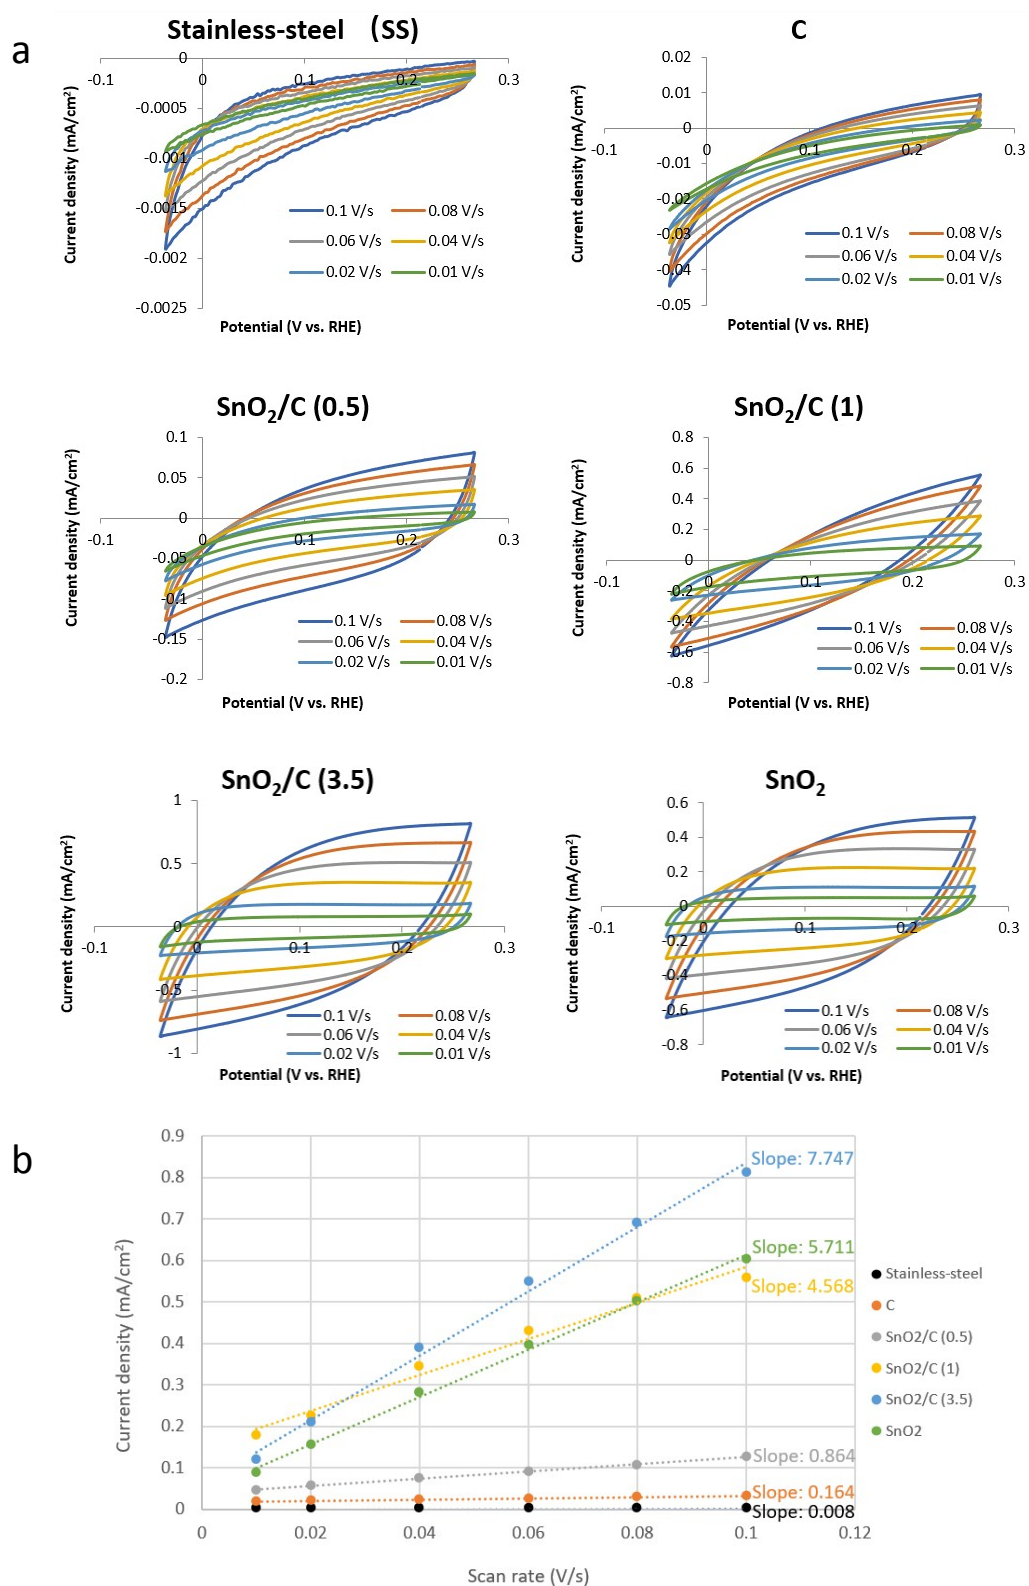

**Figure S6** Determination of double-layer capacitance for a smooth stainless-steel sheet and the SnO<sub>2</sub>/C-GDEs with various SnO<sub>2</sub>/C mass ratio. a) CVs taken in the same electrochemical cell with a cation exchange membrane and 0.1 M HClO<sub>4</sub> electrolyte as reported before<sup>[17]</sup>, over a range of scan rates in a potential window where only double-

layer charging and discharging is relevant for stainless-steel and SnO<sub>2</sub>/C-GDEs. b) Current due to double-layer charge/discharge plotted against CV scan rate for stainless-steel and SnO<sub>2</sub>/C-GDEs.

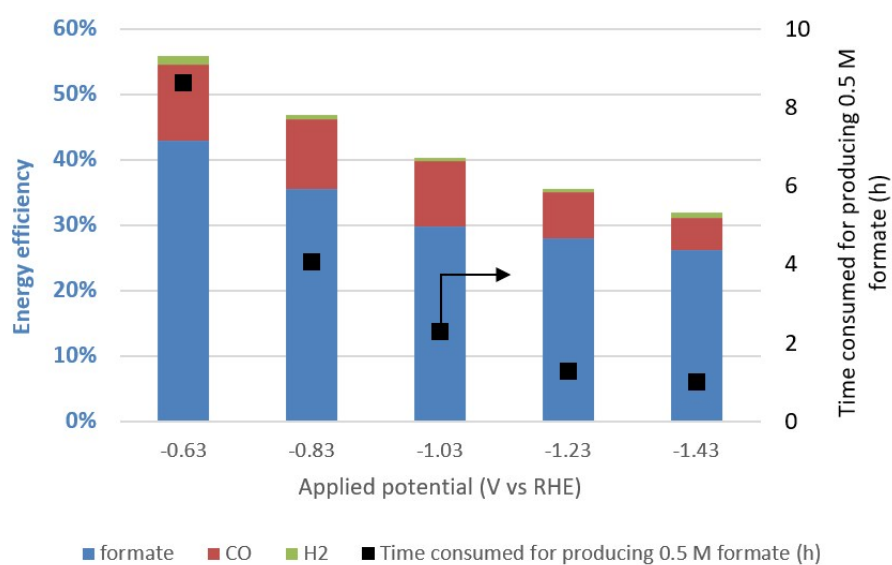

**Figure S7** Energy efficiencies of all the products from eCO<sub>2</sub>R and the time consumed for producing 0.5 M formate at at specific applied potentials -0.63 ~ -1.43 V with static catholyte.

**Table S3** Calculations on half-cell reduction potentials (in reduction form) involved in formate fuel cell when formate concentration is 0.5 M at pH=14, 60 °C. Gibbs–Helmholtz equation, Nernst equation were used based on the database from Outokumpu HSC Chemistry 6.0 software.

| Redox reactions                                                                                                                                             | $\Delta H_r^\ominus$<br>(KJ)                                                                                                                                                                                                                                                                                                                                                                                                                                                                                                                                                                                                                                            | $\Delta S_r^\ominus$ (J<br>K <sup>-1</sup> ) | $\Delta G_r^\ominus$<br>(KJ) | $E^0$ (V vs<br>SHE) | E (V vs<br>SHE) |
|-------------------------------------------------------------------------------------------------------------------------------------------------------------|-------------------------------------------------------------------------------------------------------------------------------------------------------------------------------------------------------------------------------------------------------------------------------------------------------------------------------------------------------------------------------------------------------------------------------------------------------------------------------------------------------------------------------------------------------------------------------------------------------------------------------------------------------------------------|----------------------------------------------|------------------------------|---------------------|-----------------|
| Anode half-cell:<br>$CO_2 + 2H_2O + 2e^- \rightarrow HCOOH + 2OH^-$                                                                                         | 79.689                                                                                                                                                                                                                                                                                                                                                                                                                                                                                                                                                                                                                                                                  | -343.01                                      | 181.96                       | -0.944              | -0.954          |
| Cathode half-cell<br>$\frac{1}{2}O_2 + H_2O + 2e^- \rightarrow 2OH^-$                                                                                       | -174.22                                                                                                                                                                                                                                                                                                                                                                                                                                                                                                                                                                                                                                                                 | -324.63                                      | -77.43                       | +0.402              | +0.402          |
| Full-cell<br>$HCOOH + \frac{1}{2}O_2 \rightarrow CO_2 + H_2O$                                                                                               | -253.91                                                                                                                                                                                                                                                                                                                                                                                                                                                                                                                                                                                                                                                                 | 18.39                                        | -259.39                      | _____               | 1.356           |
| $\Delta G_r^\ominus = \Delta H_r^\ominus - T\Delta S_r^\ominus$ $E^0 = -\frac{\Delta G_r^\ominus}{zF}$ $E = E^0 + \frac{RT}{zF} \ln \frac{a_{Ox}}{a_{Red}}$ | $\Delta H_r^\ominus$ : change in enthalpy at standard state<br>$\Delta S_r^\ominus$ : change in entropy at standard state<br>$\Delta G_r^\ominus$ : change in the Gibbs free energy at standard state<br>$E^0$ : standard half-cell reduction potential<br>$E$ : half-cell reduction potential<br>$z$ : the number of electrons transferred in the half-cell reaction<br>$F$ : Faradaic constant, 96485 C mol <sup>-1</sup> .<br>$R$ : gas constant, 8.413<br>$T$ : temperature, here is 298.15 K<br>$a_{Ox}/a_{Red}$ : chemical activity of the oxidized/reduced form, for solid or pure phase, $a=1$ ; for ions in solution, $a$ can be related to ion concentration. |                                              |                              |                     |                 |

## References

- 1 Wang, Q., Dong, H. & Yu, H. Development of rolling tin gas diffusion electrode for carbon dioxide electrochemical reduction to produce formate in aqueous electrolyte. *Journal of Power Sources* **271**, 278-284 (2014).
- 2 Wu, J., Risalvato, F. G., Ma, S. & Zhou, X.-D. Electrochemical reduction of carbon dioxide III. The role of oxide layer thickness on the performance of Sn electrode in a full electrochemical cell. *J. Mater. Chem. A* **2**, 1647-1651 (2014).
- 3 Lu, X., Leung, D. Y., Wang, H. & Xuan, J. A high performance dual electrolyte microfluidic reactor for the utilization of CO<sub>2</sub>. *Applied energy* **194**, 549-559 (2017).
- 4 Irtem, E. *et al.* Low-energy formate production from CO<sub>2</sub> electroreduction using electrodeposited tin on GDE. *J. Mater. Chem. A* **4**, 13582-13588 (2016).
- 5 Bitar, Z., Fecant, A., Trela-Baudot, E., Chardon-Noblat, S. & Pasquier, D. Electrocatalytic reduction of carbon dioxide on indium coated gas diffusion electrodes—Comparison with indium foil. *Applied Catalysis B: Environmental* **189**, 172-180 (2016).
- 6 Chung, J., Koh, J., Kim, E.-H. & Woo, S. I. Hierarchical Cu pillar electrodes for electrochemical CO<sub>2</sub> reduction to formic acid with low overpotential. *Phys. Chem. Chem. Phys.* **18**, 6252-6258 (2016).
- 7 Li, Y. *et al.* Rational design and synthesis of SnO<sub>x</sub> electrocatalysts with coralline structure for highly improved aqueous CO<sub>2</sub> reduction to formate. *ChemElectroChem* **3**, 1618-1628 (2016).
- 8 Lei, T. *et al.* Continuous electroreduction of carbon dioxide to formate on Tin nanoelectrode using alkaline membrane cell configuration in aqueous medium. *Catalysis Today* **318**, 32-38 (2018).
- 9 Zhang, Q. *et al.* Electrochemical Reduction of CO<sub>2</sub> by SnO<sub>x</sub> Nanosheets Anchored on Multiwalled Carbon Nanotubes with Tunable Functional Groups. *ChemSusChem* **12**, 1443-1450 (2019).
- 10 Li, F., Chen, L., Knowles, G. P., MacFarlane, D. R. & Zhang, J. Hierarchical mesoporous SnO<sub>2</sub> nanosheets on carbon cloth: a robust and flexible electrocatalyst for CO<sub>2</sub> reduction with high efficiency and selectivity. *Angew. Chem., Int. Ed.* **56**, 505-509 (2017).
- 11 Yu, J., Liu, H., Song, S., Wang, Y. & Tsiakaras, P. Electrochemical reduction of carbon dioxide at nanostructured SnO<sub>2</sub>/carbon aerogels: The effect of tin oxide content on the catalytic activity and formate selectivity. *Appl. Catal., A* **545**, 159-166 (2017).
- 12 Choi, S. Y., Jeong, S. K., Kim, H. J., Baek, I.-H. & Park, K. T. Electrochemical reduction of carbon dioxide to formate on tin–lead alloys. *ACS Sustainable Chemistry & Engineering* **4**, 1311-1318 (2016).
- 13 Guo, S. *et al.* Cu-CDots nanocorals as electrocatalyst for highly efficient CO<sub>2</sub> reduction to formate. *Nanoscale* **9**, 298-304 (2017).
- 14 Kortlever, R., Peters, I., Koper, S. & Koper, M. T. Electrochemical CO<sub>2</sub> reduction to formic acid at low overpotential and with high faradaic efficiency on carbon-supported bimetallic Pd–Pt nanoparticles. *ACS Catal.* **5**, 3916-3923 (2015).
- 15 Feaster, J. T. *et al.* Understanding selectivity for the electrochemical reduction of carbon dioxide to formic acid and carbon monoxide on metal electrodes. *ACS Catal.* **7**, 4822-4827 (2017).
- 16 Weng, L.-C., Bell, A. T. & Weber, A. Z. Modeling gas-diffusion electrodes for CO<sub>2</sub> reduction. *Phys. Chem. Chem. Phys.* **20**, 16973-16984 (2018).
- 17 Li, C. W. & Kanan, M. W. CO<sub>2</sub> reduction at low overpotential on Cu electrodes resulting from the reduction of thick Cu<sub>2</sub>O films. *J. Am. Chem. Soc.* **134**, 7231-7234 (2012).
